# Supplementary material for: Pharmacological treatments and medication-related problems in nursing homes in Catalonia: a multidisciplinary approach
Source: Front Pharmacol. 2024 Mar 11;15:1320490. doi: 10.3389/fphar.2024.1320490 (PMC10961593; doi:10.3389/fphar.2024.1320490)
Supplement: Supplementary file 1 [file Table1.XLSX]

## Sheet: SUPL Table 1
Superfamilies	n	%
(R00-R99): Symptoms, signs and abnormal clinical and laboratory findings, not elsewhere classified	1237	256.108
Unspecified urinary incontinence	412	85.3002
Other symptoms and signs involving cognitive functions and awareness	146	30.2277
Symptoms and signs involving emotional state	89	18.4265
Abnormalities of gait and mobility	88	18.2195
Fecal incontinence	85	17.5983
Edema, not elsewhere classified	42	8.69565
Pain, unspecified	39	8.07453
Other skin changes	35	7.24638
Abnormalities of breathing	29	6.00414
Age-related physical debility	26	5.38302
Symptoms, signs and abnormal clinical and laboratory findings, not elsewhere classified	23	4.7619
Abnormal involuntary movements	21	4.34783
Other symptoms and signs involving the nervous and musculoskeletal systems	17	3.51967
Elevated blood glucose level	17	3.51967
Aphagia and dysphagia	16	3.31263
Abnormalities of heart beat	15	3.10559
Speech disturbances, not elsewhere classified	15	3.10559
Other symptoms and signs involving the digestive system and abdomen	14	2.89855
Nonspecific elevation of levels of transaminase and lactic acid dehydrogenase	13	2.69151
Symptoms and signs concerning food and fluid intake	12	2.48447
Abdominal and pelvic pain	11	2.27743
Symptoms, signs and abnormal clinical and laboratory findings, not elsewhere classified	8	1.65631
Dizziness and Giddiness	7	1.44928
Schizophrenia, schizotypal, delusional, and other non-mood psychotic disorders	6	1.24224
Isolated proteinuria	6	1.24224
Disturbances of skin sensation	5	1.0352
Other lack of coordination	5	1.0352
Nausea and vomiting	4	0.828157
Benign and innocent cardiac murmurs	3	0.621118
Abnormal blood-pressure reading, without diagnosis	3	0.621118
Retention of urine	3	0.621118
Other and unspecified symptoms and signs involving the genitourinary system	3	0.621118
Malaise and fatigue	3	0.621118
Syncope and collapse	3	0.621118
Hepatomegaly and splenomegaly, not elsewhere classified	2	0.414079
Anuria and oliguria	2	0.414079
Symptoms, signs and abnormal clinical and laboratory findings, not elsewhere classified	2	0.414079
Symptoms, signs and abnormal clinical and laboratory findings, not elsewhere classified	1	0.207039
Other symptoms and signs involving the circulatory and respiratory systems	1	0.207039
Sexual dysfunction, unspecified	1	0.207039
Convulsions, not elsewhere classified	1	0.207039
Hypothermia, not associated with low environmental temperature	1	0.207039
Other and unspecified abnormal findings in urine	1	0.207039
Abnormal findings on diagnostic imaging of lung	1	0.207039
(I00-I99): Diseases of the circulatory system	1123	232.505
Essential (Primary) Hypertension	357	73.913
Atrial fibrillation and flutter	135	27.9503
Heart failure	95	19.6687
Cerebral infarction	86	17.8054
Other disorders of veins	59	12.2153
Chronic ischemic heart disease	54	11.1801
Varicose veins of lower extremities	32	6.62526
Other peripheral vascular diseases	31	6.41822
Nonrheumatic aortic valve disorders	26	5.38302
Hypertensive heart disease with (congestive) heart failure	24	4.96894
Atrioventricular and left bundle-branch block	23	4.7619
Nonrheumatic mitral valve disorders	20	4.14079
Acute myocardial infarction	19	3.93375
Other conduction disorders	19	3.93375
Angina pectoris	16	3.31263
Nontraumatic intracerebral hemorrhage	11	2.27743
Pulmonary embolism with mention of acute cor pulmonale	10	2.07039
Occlusion and stenosis of precerebral arteries, not resulting in cerebral infarction	10	2.07039
Rheumatic mitral valve diseases	9	1.86335
Nonrheumatic tricuspid valve disorders	8	1.65631
Complications and ill-defined descriptions of heart disease	8	1.65631
Sequelae of cerebrovascular disease	7	1.44928
Atherosclerosis	7	1.44928
Aortic aneurysm and dissection	7	1.44928
Other pulmonary heart diseases	6	1.24224
Cardiomyopathy	6	1.24224
Other cardiac arrhythmias	6	1.24224
Other cerebrovascular diseases	6	1.24224
Paroxysmal tachycardia	5	1.0352
Phlebitis and thrombophlebitis	3	0.621118
Other venous embolism and thrombosis	3	0.621118
Other and unspecified disorders of circulatory system	3	0.621118
Rheumatic aortic insufficiency	2	0.414079
Other aneurysm	2	0.414079
Arterial embolism and thrombosis	2	0.414079
Hereditary haemorrhagic telangiectasia	2	0.414079
Diseases of the circulatory system	2	0.414079
Other acute ischaemic heart diseases	1	0.207039
Other disorders of arteries and arterioles	1	0.207039
(E00-E90): Endocrine, nutritional and metabolic diseases	864	178.882
Disorders of lipoprotein metabolism and other lipidemias	260	53.8302
Diabetes mellitus	144	29.8137
Vitamin D deficiency	99	20.4969
Overweight and obesity	83	17.1843
Hypothyroidism	59	12.2153
Vitamin B deficiency, unspecified	58	12.0083
Hyperuricemia	40	8.28157
Other disorders of fluid, electrolyte and acid-base balance	30	6.21118
Dehydration	16	3.31263
Subclinical iodine-deficiency hypothyroidism	14	2.89855
Thyroid nodule	14	2.89855
Thyrotoxicosis [hyperthyroidism]	10	2.07039
Iron deficiency	10	2.07039
Mineral disorders	5	1.0352
Thyroiditis	4	0.828157
Hypoglycemia	3	0.621118
Lactose intolerance	3	0.621118
Hyperparathyroidism, unspecified	2	0.414079
Malnutrition	2	0.414079
Hypoparathyroidism, unspecified	1	0.207039
Cushing's syndrome	1	0.207039
Adrenogenital disorders	1	0.207039
Endocrine disorder, unspecified	1	0.207039
Wernicke's encephalopathy	1	0.207039
Dietary calcium deficiency	1	0.207039
Nutritional deficiency, unspecified	1	0.207039
Lipodystrophy	1	0.207039
(M00-M99): Diseases of the musculoskeletal system and connective tissue	692	143.271
Osteoarthritis	197	40.7867
Age-Related Osteoporosis without Current Pathological Fracture	72	14.9068
Other arthritis	67	13.8716
Dorsalgia	66	13.6646
Osteoporosis with pathological fracture	58	12.0083
Other joint disorders, not elsewhere classified	48	9.93789
Other soft tissue disorders, not elsewhere classified	34	7.03934
Acquired deformities of fingers and toes	16	3.31263
Scoliosis	16	3.31263
Other disorders of synovium and tendon	14	2.89855
Other disorders of bone density and structure	14	2.89855
Other systemic involvement of connective tissue	13	2.69151
Spondylosis	12	2.48447
Idiopathic gout	9	1.86335
Spinal stenosis, site unspecified	8	1.65631
Other deforming dorsopathies	6	1.24224
Rheumatoid arthritis with rheumatoid factor	5	1.0352
Synovitis and tenosynovitis	4	0.828157
Other bursopathies	4	0.828157
Fibroblastic disorders	3	0.621118
Other enthesopathies	3	0.621118
Osteitis deformans	3	0.621118
Other and unspecified arthropathy	2	0.414079
Internal derangement of knee	2	0.414079
Other necrotizing vasculopathies	2	0.414079
Other intervertebral disc disorders	2	0.414079
Disorder of bone, unspecified	2	0.414079
Other disorders of cartilage	2	0.414079
Other rheumatoid arthritis	1	0.207039
Other crystal arthropathies	1	0.207039
Other acquired deformities of limbs	1	0.207039
Dentofacial anomalies	1	0.207039
Other inflammatory spondylopathies	1	0.207039
Soft tissue disorders related to use, overuse and pressure	1	0.207039
Shoulder lesions	1	0.207039
Adult osteomalacia due to malnutrition	1	0.207039
(Z00-Z99): Factors influencing health status and contact with health services	654	135.404
Problems related to care provider dependency	146	30.2277
Dependence on enabling machines and devices, not elsewhere classified	104	21.5321
Encounter for other prophylactic measures	102	21.118
Personal history of medical treatment	97	20.0828
Personal history of allergy to drugs, medicaments and biological substances	93	19.2547
Presence of cardiac and vascular implants and grafts	22	4.55487
Personal history of certain other diseases	21	4.34783
Problems related to life-management difficulty	20	4.14079
Personal history of malignant neoplasm	13	2.69151
Personal risk factors, not elsewhere classified	9	1.86335
Problems related to lifestyle	8	1.65631
Problems related to housing and economic circumstances	3	0.621118
Problems related to social environment	3	0.621118
Family history of malignant neoplasm of digestive organs	2	0.414079
Transplanted organ and tissue status	2	0.414079
Other postprocedural states	2	0.414079
Other special examinations and investigations of persons without symptoms or reported diagnosis	1	0.207039
Encounter for screening for other diseases and disorders	1	0.207039
Problems related to education and literacy	1	0.207039
Other problems related to primary support group, including family circumstances	1	0.207039
Problems related to medical facilities and other health care	1	0.207039
Family history of mental and behavioural disorders	1	0.207039
Presence of other devices	1	0.207039
(G00-G99): Diseases of the nervous system	522	108.075
Insomnia and sleep disorders	181	37.4741
Alzheimer's disease	131	27.1222
Acute pain	55	11.3872
Parkinson's disease	29	6.00414
Epilepsy	29	6.00414
Hemiplegia and hemiparesis	17	3.51967
Hydrocephalus	17	3.51967
Carpal tunnel syndrome	10	2.07039
Polyneuropathy	9	1.86335
Secondary parkinsonism	6	1.24224
Dementia	5	1.0352
Restless legs syndrome	4	0.828157
Neuralgia	3	0.621118
Mononeuropathies of lower limb	3	0.621118
Myopathy	3	0.621118
Parapleagia and quadriplegia	3	0.621118
Myalgic encephalomyelitis/chronic fatigue syndrome	3	0.621118
Other disorders of central nervous system	3	0.621118
Multiple sclerosis	2	0.414079
Headache	2	0.414079
Cerebral palsy	2	0.414079
Dyskinesia	1	0.207039
Migraine	1	0.207039
Stroke	1	0.207039
Nerve root and plexus compressions in diseases classified elsewhere	1	0.207039
Inflammatory polyneuropathy	1	0.207039
(F00-F99): Mental and behavioral disorders	515	106.625
Depressive episode	138	28.5714
Anxiety, dissociative, stress-related, somatoform and other nonpsychotic mental disorders (F40-F48)	130	26.9151
Unspecified dementia	79	16.3561
Vascular dementia	40	8.28157
Nicotine	26	5.38302
Delirium due to known physiological condition	21	4.34783
Conduct disorder	15	3.10559
Alcohol	14	2.89855
Schizophrenia	13	2.69151
Dysthymic disorder	7	1.44928
Personality disorder	7	1.44928
Bipolar affective disorder	6	1.24224
Mental disorder	6	1.24224
Unspecified psychosis not due to a substance or known physiological condition	4	0.828157
Manic episode	2	0.414079
Insomnia	2	0.414079
Intellectual Disabilities	2	0.414079
Delusional disorders	1	0.207039
Speech and language disorder	1	0.207039
Developmental disorder of scholastic skills	1	0.207039
(K00-K93): Diseases of the digestive system	511	105.8
Other functional intestinal disorders	146	30.2277
Hernia	85	17.5983
Diseases of esophagus, stomach and duodenum	76	15.735
Disorders of gallbladder, biliary tract and pancreas	55	11.3872
Diverticular disease of intestine	33	6.8323
Other diseases of liver	20	4.14079
Other disorders of teeth and supporting structures	15	3.10559
Other diseases of intestine	15	3.10559
Other noninfective gastroenteritis and colitis	12	2.48447
Dental caries	8	1.65631
Gingivitis and periodontal diseases	8	1.65631
Irritable bowel syndrome	7	1.44928
Haemorrhoids and perianal venous thrombosis	6	1.24224
Paralytic ileus and intestinal obstruction without hernia	5	1.0352
Other diseases of anus and rectum	3	0.621118
Other diseases of digestive system	3	0.621118
Stomatitis and related lesions	2	0.414079
Ulcerative colitis	2	0.414079
Toxic liver disease with cholestasis	2	0.414079
Diseases of pulp and periapical tissues	1	0.207039
Diseases of salivary glands	1	0.207039
Other diseases of lip and oral mucosa	1	0.207039
Crohn's disease	1	0.207039
Vascular disorders of intestine	1	0.207039
Fissure and fistula of anal and rectal regions	1	0.207039
Fibrosis and cirrhosis of liver	1	0.207039
Intestinal malabsorption	1	0.207039
(N00-N99): Diseases of the genitourinary system	348	72.0497
Chronic kidney disease	134	27.7433
Other disorders of urinary system	71	14.6998
Benign prostatic hyperplasia	60	12.4224
Calculus of kidney and ureter	28	5.7971
Female genital prolapse	16	3.31263
Benign mammary dysplasia	7	1.44928
Other disorders of breast	6	1.24224
Menopausal and other perimenopausal disorders	6	1.24224
Diseases of Bartholin's gland	5	1.0352
Pain and other conditions associated with female genital organs and menstrual cycle	3	0.621118
Other disorders of bladder	2	0.414079
Inflammatory diseases of prostate	2	0.414079
Noninflammatory disorders of ovary, fallopian tube and broad ligament	2	0.414079
Disorders of prepuce	1	0.207039
Vulvovaginal ulceration and inflammation in diseases classified elsewhere	1	0.207039
Polyp of female genital tract	1	0.207039
Other noninflammatory disorders of uterus, except cervix	1	0.207039
Excessive, frequent and irregular menstruation	1	0.207039
Postprocedural disorders of genitourinary system, not elsewhere classified	1	0.207039
(H00-H59): Diseases of the eye and adnexa	293	60.6625
Age-related cataract	99	20.4969
Glaucoma	87	18.0124
Disorders of lacrimal system	20	4.14079
Other retinal disorders	19	3.93375
Conjunctivitis	17	3.51967
Visual disturbances	15	3.10559
Visual impairment including blindness (binocular or monocular)	12	2.48447
Other disorders of eyelid	5	1.0352
Disorders of refraction and accommodation	4	0.828157
Disorders of vitreous body	3	0.621118
Retinal vascular occlusions	2	0.414079
Disorders of globe	2	0.414079
Other disorders of eye and adnexa	2	0.414079
Corneal scars and opacities	1	0.207039
Other disorders of iris and ciliary body	1	0.207039
Other cataract	1	0.207039
Retinal detachments and breaks	1	0.207039
Retinal disorders in diseases classified elsewhere	1	0.207039
Nystagmus and other irregular eye movements	1	0.207039
(L00-L99): Diseases of the skin and subcutaneous tissue	289	59.8344
Pressure ulcer	122	25.2588
Dermatitis and eczema	89	18.4265
Skin changes due to chronic exposure to nonionizing radiation	24	4.96894
Diseases of the skin and subcutaneous tissue	10	2.07039
Seborrheic keratosis	10	2.07039
Cellulitis and acute lymphangitis	8	1.65631
Other local infections of skin and subcutaneous tissue	5	1.0352
Diseases of the skin and subcutaneous tissue	4	0.828157
Nail disorders	4	0.828157
Lichen planus	3	0.621118
Cutaneous abscess, furuncle and carbuncle	2	0.414079
Diseases of the skin and subcutaneous tissue	2	0.414079
Erythema nodosum	1	0.207039
Androgenic alopecia	1	0.207039
Other follicular disorders	1	0.207039
Other disorders of pigmentation	1	0.207039
Hypertrophic disorders of skin	1	0.207039
Vasculitis limited to skin, not elsewhere	1	0.207039
(D50-D89): Diseases of the blood and blood-forming organs and certain disorders involving the immune mechanism	267	55.2795
Anemia, unspecified	109	22.5673
Iron deficiency anemia	79	16.3561
Vitamin B12 deficiency anemia	38	7.86749
Folate deficiency anemia	21	4.34783
Qualitative platelet defects	7	1.44928
White blood count	6	1.24224
Other megaloblastic anemias, not elsewhere classified	2	0.414079
Acquired hemolytic anemia, unspecified	2	0.414079
Thalassemia	1	0.207039
Anemia in other chronic diseases classified elsewhere	1	0.207039
Thrombocytosis	1	0.207039
(S00-T98): Injury, poisoning and certain other consequences of external causes	256	53.0021
Injury of unspecified body region	133	27.5362
Fracture of femur	59	12.2153
Fracture of lumbar spine and pelvis	21	4.34783
Dislocation, sprain and strain of joints and ligaments of shoulder girdle	11	2.27743
Intracranial injury	8	1.65631
Other and unspecified injuries of head	6	1.24224
Dislocation, sprain and strain of joints and ligaments of knee	3	0.621118
Fracture of skull and facial bones	2	0.414079
Fracture of shoulder and upper arm	2	0.414079
Dislocation, sprain and strain of joints and ligaments at neck level	1	0.207039
Injury of nerves and spinal cord at neck level	1	0.207039
Fracture of rib(s), sternum and thoracic spine	1	0.207039
Injury of muscles and tendons at shoulder and upper arm level	1	0.207039
Dislocation, sprain and strain of joints and ligaments at wrist and hand level	1	0.207039
Fracture of lower leg, including ankle	1	0.207039
Poisoning by primarily systemic and haematological agents, not elsewhere classified	1	0.207039
Toxic effect of metals	1	0.207039
Exhaustion due to excessive exertion, initial encounter	1	0.207039
Adult and child abuse, neglect and other maltreatment, suspected	1	0.207039
Complications of procedures, not elsewhere classified	1	0.207039
(U00-U99): Codes for special purposes	197	40.7867
COVID-19	197	40.7867
(J00-J99): Diseases of the respiratory system	188	38.9234
Other chronic obstructive pulmonary disease	56	11.5942
Bronchitis, not specified as acute or chronic	31	6.41822
Other respiratory disorders	20	4.14079
Vasomotor and allergic rhinitis	16	3.31263
Asthma	13	2.69151
Pneumonia, organism unspecified	9	1.86335
Diseases of the respiratory system	7	1.44928
Unspecified acute lower respiratory infection	6	1.24224
Pneumonitis due to food and vomit	6	1.24224
Pulmonary edema	5	1.0352
Chronic rhinitis, nasopharyngitis and pharyngitis	4	0.828157
Other interstitial pulmonary diseases	4	0.828157
Acute upper respiratory infections of multiple and unspecified sites	3	0.621118
Diseases of the respiratory system	3	0.621118
Chronic sinusitis	2	0.414079
Chronic diseases of tonsils and adenoids	1	0.207039
Pneumoconiosis due to asbestos and other mineral fibers	1	0.207039
Pleural effusion, not elsewhere classified	1	0.207039
(C00-D48): Neoplasms	150	31.0559
Malignant neoplasm	104	21.5321
Benign neoplasm	38	7.86749
Myelodysplastic syndromes	5	1.0352
Monoclonal gammopathy	3	0.621118
(H60-H95): Diseases of the ear and mastoid process	109	22.5673
Other and unspecified hearing loss	90	18.6335
Other disorders of ear, not elsewhere classified	11	2.27743
Central perforation of tympanic membrane	4	0.828157
Otitis externa	1	0.207039
Other disorders of external ear	1	0.207039
Disorders of external ear in diseases classified elsewhere	1	0.207039
Disorders of vestibular function	1	0.207039
Interventions	131	27.1222
Spherophakia	29	6
Knee prosthesis	25	5.17598
Hysterectomy	22	4.55487
Cholecystectomy	20	4.14079
Hip prosthesis	17	3.51967
Appendectomy	11	2.27743
Colostomy or ileostomy	7	1.44928
(A00-B99): Certain infectious and parasitic diseases	61	12.6294
Infections	61	12.6294
(V01-Y98): External causes of morbidity and mortality	12	2.48447
Surgical operation and other surgical procedures as the cause of abnormal reaction of the patient	4	0.83
Slipping, tripping, stumbling and falls (W00-W19)	3	0.62
Intentional self-harm by sharp object	2	0.41
Assault by other specified means	1	0.21
Other medical procedures as the cause of abnormal reaction of the patient	1	0.21
Place of occurrence of the external cause	1	0.21

## Sheet: SUPL Table 2
A- Alimentary tract and metabolism (n=708)
Name	ATC	n	%
Omeprazole	A02BC01	274	56.8465
Vitamin D and analogues	A11CC	86	17.84
Metformin	A10BA02	60	12.4481
Calcium, combinations with vitamin D and/or other drugs	A12AX	54	11.2033
Insulin glargine	A10AE04	31	6.43154
Insulin aspart	A10AB05	20	4.14938
Macrogol	A06AD15	16	3.3195
Pantoprazole	A02BC02	14	2.90456
Lactulose	A06AD11	10	2.07469
Domperidone	A03FA03	8	1.65975
Ispaghula (psylla seeds)	A06AC01	7	1.45228
Potassium	A12BA	7	1.45228
Acetylsalicylic acid	A01AD05	6	1.24481
Esomeprazole	A02BC05	6	1.24481
Metformin and sitagliptin	A10BD07	6	1.24481
Sitagliptin	A10BH01	6	1.24481
Insulin detemir	A10AE05	5	1.03734
Linagliptin	A10BH05	5	1.03734
Metoclopramide	A03FA01	4	0.829876
Ursodeoxycholic acid	A05AA02	4	0.829876
Lactitol	A06AD12	4	0.829876
Betamethasone	A07EA04	4	0.829876
Gliclazide	A10BB09	4	0.829876
Calcium carbonate	A02AC01	3	0.622407
Clebopride	A03FA06	3	0.622407
Osmotically acting laxatives	A06AD	3	0.622407
Rifaximin	A07AA11	3	0.622407
Loperamide	A07DA03	3	0.622407
Insulin lispro	A10AB04	3	0.622407
Repaglinide	A10BX02	3	0.622407
Vitamin B1, plain	A11DA	3	0.622407
Calcium	A12AA	3	0.622407
Ranitidine	A02BA02	2	0.414938
Lansoprazole	A02BC03	2	0.414938
Magnesium oxide	A06AD02	2	0.414938
Prednisone	A07EA03	2	0.414938
Insulin glulisine	A10AB06	2	0.414938
Pioglitazone	A10BG03	2	0.414938
Vildagliptin	A10BH02	2	0.414938
Vitamin B-complex, plain	A11EA	2	0.414938
Potassium hydrogencarbonate	A12BA04	2	0.414938
Clotrimazole	A01AB18	1	0.207469
Prednisolone, combinations	A01AC54	1	0.207469
Antacids containing magnesium compounds	A02AA	1	0.207469
Famotidine	A02BA03	1	0.207469
Silicones	A03AX13	1	0.207469
Liquid paraffin	A06AA01	1	0.207469
Lactulose, combinations	A06AD61	1	0.207469
Mesalazine	A07EC02	1	0.207469
Glutamic acid hydrochloride	A05BA	1	0.207469
Insulin (human)	A10AC01	1	0.207469
Insulin degludec and insulin aspart	A10AD06	1	0.207469
Insulin degludec	A10AE06	1	0.207469
Metformin and vildagliptin	A10BD08	1	0.207469
Metformin and saxagliptin	A10BD10	1	0.207469
Saxagliptin	A10BH03	1	0.207469
Dapagliflozin	A10BK01	1	0.207469
Tocopherol	A11HA03	1	0.207469
Calcium carbonate	A12AA04	1	0.207469
Potassium citrate	A12BA02	1	0.207469
Magnesium supplements, alimentary tract and metabolism	A12CC	1	0.207469
Magnesium chloride	A12CC01	1	0.207469
Magnesium citrate	A12CC04	1	0.207469
B- Blood and blood forming organs (n=441)
Name	ATC	n	%
Acetylsalicylic acid	B01AC06	134	27.8
Ferrous glycine sulfate	B03AA01	60	12.4481
Folic acid	B03BB01	40	8.3
Apixaban	B01AF02	37	7.67635
Clopidogrel	B01AC04	34	7.05394
Acenocoumarol	B01AA07	31	6.43154
Rivaroxaban	B01AF01	21	4.35685
Cyanocobalamin	B03BA01	19	3.94191
Edoxaban	B01AF03	9	1.86722
Vitamin B12 and folic acid	B03B	9	1.86722
Dabigatran etexilate	B01AE07	8	1.65975
Ferrous sulfate	B03AD03	8	1.65975
Enoxaparin	B01AB05	5	1.03734
Vitamin B12 (cyanocobalamin and analogues)	B03BA	5	1.03734
Warfarin	B01AA03	4	0.829876
Ferrous sulfate	B03AA07	3	0.622407
Triflusal	B01AC18	2	0.414938
Iron trivalent, oral antianemic preparations	B03AB	2	0.414938
Ferrous gluconate	B03AD05	2	0.414938
Cyanocobalamin, combinations	B03BA51	2	0.414938
Darbepoetin alfa	B03XA02	2	0.414938
Dipyridamole	B01AC07	1	0.207469
Cilostazol	B01AC23	1	0.207469
Tranexamic acid	B02AA02	1	0.207469
Iron, parenteral antianemic preparations	B03AC	1	0.207469
C- Cardiovascular system (n=875)
Name	ATC	n	%
Furosemide	C03CA01	144	29.8755
Enalapril	C09AA02	109	22.6141
Bisoprolol	C07AB07	89	18.4647
Simvastatin	C10AA01	78	16.1826
Amlodipine	C08CA01	66	13.6929
Atorvastatin	C10AA05	61	12.6556
Losartan	C09CA01	41	8.50622
Hydrochlorothiazide	C03AA03	34	7.05394
Glyceryl trinitrate	C05AE01	20	4.14938
Digoxin	C01AA05	19	3.94191
Timolol and thiazides	C07BA06	19	3.94191
Carvedilol	C07AG02	16	3.3195
Enalapril and diuretics	C09BA02	15	3.11203
Torasemide	C03CA04	13	2.6971
Spironolactone	C03DA01	13	2.6971
Diltiazem	C05AE03	11	2.28216
Atenolol	C07AB03	10	2.07469
Losartan and diuretics	C09DA01	8	1.65975
Amiodarone	C01BD01	6	1.24481
Ramipril	C09AA05	6	1.24481
Doxazosin	C02CA04	5	1.03734
Captopril	C09AA01	5	1.03734
Lisinopril	C09AA03	5	1.03734
Valsartan	C09CA03	5	1.03734
Telmisartan	C09CA07	5	1.03734
Lisinopril and diuretics	C09BA03	4	0.829876
Ezetimibe	C10AX09	4	0.829876
Glyceryl trinitrate	C01DA02	3	0.622407
Hydrochlorothiazide and potassium-sparing agents	C03EA01	3	0.622407
Pentoxifylline	C04AD03	3	0.622407
Prednisolone	C05AA04	3	0.622407
Propranolol	C07AA05	3	0.622407
Etilefrine	C01CA01	2	0.414938
Isosorbide mononitrate	C01DA14	2	0.414938
Trimetazidine	C01EB15	2	0.414938
Ranolazine	C01EB18	2	0.414938
Hydralazine	C02DB02	2	0.414938
Indapamide	C03BA11	2	0.414938
Eplerenone	C03DA04	2	0.414938
Dexamethasone	C05AA09	2	0.414938
Olmesartan medoxomil	C09CA08	2	0.414938
Olmesartan medoxomil and amlodipine	C09DB02	2	0.414938
Valsartan, amlodipine and hydrochlorothiazide	C09DX01	2	0.414938
Pravastatin	C10AA03	2	0.414938
Epinephrine	C01CA24	1	0.207469
Propafenone	C01BC03	1	0.207469
Flecainide	C01BC04	1	0.207469
Ivabradine	C01EB17	1	0.207469
Hydrochlorothiazide, combinations	C03AX01	1	0.207469
Naftidrofuryl	C04AX21	1	0.207469
Diosmin	C05CA03	1	0.207469
Timolol	C07AA06	1	0.207469
Nebivolol	C07AB12	1	0.207469
Nifedipine	C08CA05	1	0.207469
Manidipine	C08CA11	1	0.207469
Lercanidipine	C08CA13	1	0.207469
Verapamil	C08DA01	1	0.207469
Eprosartan	C09CA02	1	0.207469
Irbesartan	C09CA04	1	0.207469
Valsartan and diuretics	C09DA03	1	0.207469
Candesartan and diuretics	C09DA06	1	0.207469
Telmisartan and diuretics	C09DA07	1	0.207469
Olmesartan medoxomil and diuretics	C09DA08	1	0.207469
Lovastatin	C10AA02	1	0.207469
Rosuvastatin	C10AA07	1	0.207469
Pitavastatin	C10AA08	1	0.207469
Gemfibrozil	C10AB04	1	0.207469
Fenofibrate	C10AB05	1	0.207469
Colestyramine	C10AC01	1	0.207469
D- Dermatologicals (n=38)
Name	ATC	n	%
Ciclopirox	D01AE14	9	1.87
Finasteride	D11AX10	5	1.03734
Budesonide	D07AC09	3	0.622407
Propanol	D08AX03	3	0.622407
Clindamycin	D10AF01	3	0.622407
Ketoconazole	D01AC08	2	0.414938
Amorolfine	D01AE16	2	0.414938
Mupirocin	D06AX09	2	0.414938
Clobetasol	D07AD01	2	0.414938
Collagenase, combinations	D03BA52	1	0.207469
Tacalcitol	D05AX04	1	0.207469
Aciclovir	D06BB03	1	0.207469
Methylprednisolone	D07AA01	1	0.207469
Hydrocortisone	D07XA01	1	0.207469
Potassium permanganate	D08AX06	1	0.207469
Collagen, combinations	D11AX57	1	0.207469
G- Genito urinary system and sex hormones (n=48)
Name	ATC	n	%
Tamsulosin	G04CA02	20	4.15
Tamsulosin and dutasteride	G04CA52	9	1.87
Mirabegron	G04BD12	5	1.04
Solifenacin	G04BD08	3	0.62
Fesoterodine	G04BD11	2	0.41
Finasteride	G04CB01	2	0.41
Dutasteride	G04CB02	2	0.41
Miconazole	G01AF04	1	0.21
Megestrol	G03AC05	1	0.21
Raloxifene	G03XC01	1	0.21
Alfuzosin	G04CA01	1	0.21
Prunus africanae cortex	G04CX01	1	0.21
H- Systemic hormonal preparations (n=89)
Name	ATC	n	%
Levothyroxine sodium	H03AA01	60	12.45
Prednisone	H02AB07	7	1.45
Deflazacort	H02AB13	3	0.62
Thiamazole	H03BB02	3	0.62
Teriparatide	H05AA02	3	0.62
Calcifediol	H05BX05	3	0.62
Methylprednisolone	H02AB04	2	0.41
Hydrocortisone	H02AB09	2	0.41
Glucagon, glucose	H04AA01	2	0.41
Pancreatic hormones	H04	2	0.41
Octreotide	H01CB02	1	0.21
Ketoconazole	H02CA03	1	0.21
J- Antiinfective for systemic use (n=9)
Name	ATC	n	%
Sulfamoxole and trimethoprim	J01EE04	2	0.41
Azithromycin	J01FA10	2	0.41
Tobramycin	J01GB01	2	0.41
Ciprofloxacin	J01MA02	1	0.21
Fosfomycin	J01XX01	1	0.21
Fluconazole	J02AC01	1	0.21
L- Antineoplasic and inmunomodulating agents (n=24)
Name	ATC	n	%
Letrozole	L02BG04	5	1.04
Hydroxycarbamide	L01XX05	3	0.62
Azathioprine	L04AX01	2	0.41
Cyclophosphamide	L01AA01	1	0.21
Nitrogen	L01AA	1	0.207469
Anagrelide	L01XX35	1	0.21
Venetoclax	L01XX52	1	0.21
Leuprorelin	L02AE02	1	0.21
Triptorelin	L02AE04	1	0.21
Fulvestrant	L02BA03	1	0.21
Bicalutamide	L02BB03	1	0.21
Anastrozole	L02BG03	1	0.21
Exemestane	L02BG06	1	0.21
Filgrastim	L03AA02	1	0.21
Mycophenolic acid	L04AA06	1	0.21
Methotrexate	L04AX03	1	0.21
Lenalidomide	L04AX04	1	0.21
M- Musculo-skeletal system (n=57)
Name	ATC	n	%
Allopurinol	M04AA01	18	3.73
Alendronic acid	M05BA04	14	2.9
Denosumab	M05BX04	9	1.87
Diclofenac	M01AB05	5	1.04
Baclofen	M03BX01	5	1.04
Risedronic acid	M05BA07	2	0.41
Aceclofenac	M01AB16	1	0.21
Dexketoprofen	M01AE17	1	0.21
Naproxen and esomeprazole	M01AE52	1	0.21
Febuxostat	M04AA03	1	0.21
N- Nervous system (n=1474)
Name	ATC	n	%
Paracetamol	N02BE01	269	55.81
Quetiapine	N05AH04	183	37.97
Lorazepam	N05BA06	105	21.78
Sertraline	N06AB06	74	15.35
Trazodone	N06AX05	69	14.32
Citalopram	N06AB04	62	12.86
Risperidone	N05AX08	61	12.66
Mirtazapine	N06AX11	53	11
Memantine	N06DX01	43	8.92
Metamizole sodium	N02BB02	41	8.51
Fentanyl	N02AB03	35	7.26
Gabapentin	N02BF01	31	6.43
Pregabalin	N03AX16	29	6.02
Donepezil	N06DA02	28	5.81
Rivastigmine	N06DA03	28	5.81
Tramadol	N02AX02	25	5.19
Levodopa and decarboxylase inhibitor	N04BA02	25	5.19
Lormetazepam	N05CD06	25	5.19
Levetiracetam	N03AX14	21	4.36
Haloperidol	N05AD01	19	3.94
Clomethiazole	N05CM02	18	3.73
Alprazolam	N05BA12	16	3.32
Galantamine	N06DA04	16	3.32
Tramadol and paracetamol	N02AJ13	14	2.9
Paroxetine	N06AB05	13	2.7
Clonazepam	N03AE01	12	2.49
Betahistine	N07CA01	12	2.49
Venlafaxine	N06AX16	10	2.07
Diazepam	N05BA01	9	1.87
Valproic acid	N03AG01	8	1.66
Duloxetine	N06AX21	8	1.66
Citicoline	N06BX06	6	1.24
Pramipexole	N04BC05	5	1.04
Rotigotine	N04BC09	5	1.04
Aripiprazole	N05AX12	5	1.04
Potassium clorazepate	N05BA05	5	1.04
Amitriptyline	N06AA09	5	1.04
Carbamazepine	N03AF01	4	0.83
Rasagiline	N04BD02	4	0.83
Safinamide	N04BD03	4	0.83
Olanzapine	N05AH03	4	0.83
Codeine and paracetamol	N02AJ06	3	0.62
Lamotrigine	N03AX09	3	0.62
Lacosamide	N03AX18	3	0.62
Levodopa	N04BA01	3	0.62
Clozapine	N05AH02	3	0.62
Bromazepam	N05BA08	3	0.62
Escitalopram	N06AB10	3	0.62
Vortioxetine	N06AX26	3	0.62
Morphine	N02AA01	2	0.41
Tapentadol	N02AX06	2	0.41
Metamizole sodium, combinations excl. psycholeptics	N02BB52	2	0.41
Primidone	N03AA03	2	0.41
Levosulpiride	N05AL07	2	0.41
Hydroxyzine	N05BB01	2	0.41
Loprazolam	N05CD11	2	0.41
Zolpidem	N05CF02	2	0.41
Desvenlafaxine	N06AX23	2	0.41
Oxycodone and naloxone	N02AA55	1	0.21
Fentanyl	N02AB03	1	0.21
Metamizole sodium, combinations with psycholeptics	N02BB72	1	0.21
Phenytoin	N03AB02	1	0.21
Oxcarbazepine	N03AF02	1	0.21
Topiramate	N03AX11	1	0.21
Zonisamide	N03AX15	1	0.21
Perampanel	N03AX22	1	0.21
Brivaracetam	N03AX23	1	0.21
Trihexyphenidyl	N04AA01	1	0.21
Levodopa, decarboxylase inhibitor and COMT inhibitor	N04BA03	1	0.21
Entacapone	N04BX02	1	0.21
Levomepromazine	N05AA02	1	0.21
Perphenazine	N05AB03	1	0.21
Clotiapine	N05AH06	1	0.21
Sulpiride	N05AL01	1	0.21
Lithium	N05AN01	1	0.21
Benzodiazepine derivative anxiolytics	N05BA	1	0.21
Flurazepam	N05CD01	1	0.21
Midazolam	N05CD08	1	0.21
Valerianae radix	N05CM09	1	0.21
Fluoxetine	N06AB03	1	0.21
Nicotine	N07BA01	1	0.21
P- Antiparasitic products, insecticides and repellents (n=1)
Name	ATC	n	%
Hydroxychloroquine	P01BA02	1	0.21
R- Respiratory system (n=119)
Name	ATC	n	%
Ipratropium bromide	R03BB01	31	6.4
Tiotropium bromide	R03BB04	15	3.11
Budesonide	R01AD05	13	2.7
Salmeterol and fluticasone	R03AK06	10	2.07
Salbutamol	R03AC02	7	1.45
Salmeterol	R03AC12	7	1.45
Formoterol and budesonide	R03AK07	6	1.24
Formoterol and beclometasone	R03AK08	6	1.24
Cetirizine	R06AE07	3	0.62
Loratadine	R06AX13	3	0.62
Formoterol and fluticasone	R03AK11	2	0.41
Acetylcysteine	R05CB01	2	0.414938
Ebastine	R06AX22	2	0.41
Mometasone	R01AD09	1	0.21
Formoterol	R03AC13	1	0.21
Olodaterol	R03AC19	1	0.21
Vilanterol and fluticasone furoate	R03AK10	1	0.21
Salbutamol and ipratropium bromide	R03AL02	1	0.21
Indacaterol and glycopyrronium bromide	R03AL04	1	0.21
Olodaterol and tiotropium bromide	R03AL06	1	0.21
Fluticasone furoate	R03BA09	1	0.21
Montelukast	R03DC03	1	0.21
Dexchlorpheniramine	R06AB02	1	0.21
Rupatadine	R06AX28	1	0.21
Bilastine	R06AX29	1	0.21
S- Sensory organs (n=76)
Name	ATC	n	%
Latanoprost	S01EE01	27	5.6
Timolol	S01ED01	8	1.66
Artificial tears and other indifferent preparations	S01XA20	8	1.66
Bimatoprost	S01EE03	7	1.45
Acetazolamide	S01EC01	3	0.62
brinzolamide	S01EC04	3	0.62
brinzolamide, combinations	S01EC54	3	0.62
Timolol, combinations	S01ED51	3	0.62
Travoprost	S01EE04	3	0.62
Brimonidine	S01GA07	3	0.62
Dorzolamide	S01EC03	2	0.41
Azithromycin	S01AA26	1	0.21
Famciclovir	S01AD07	1	0.21
Carteolol	S01ED05	1	0.21
Tafluprost	S01EE05	1	0.21
Olopatadine	S01GX09	1	0.21
Fluocinolone acetonide	S02BA08	1	0.21
V- Various (n=2)
Name	ATC	n	%
Polystyrene sulfonate	V03AE01	1	0.207469
Sodium phosphate	V03AG05	1	0.207469
